# Supplementary material
Source: PubMed Central journal article supplement (PMC7270370)
Supplement: 40200_2020_545_MOESM1_ESM.pdf [file 40200_2020_545_MOESM1_ESM.pdf]

**Table A**

List of hotspots (districts) for the prevalence of diabetes

| Hot spot (District)         | State/Union Territory | Region        | Prevalence of Diabetes<br>(per 100 women) |
|-----------------------------|-----------------------|---------------|-------------------------------------------|
| Aizawl                      | Mizoram               | North-eastern | 17.24                                     |
| Kannur                      | Kerala                | Southern      | 12.58                                     |
| Diu                         | Daman & Diu           | Eastern       | 12.97                                     |
| Puri                        | Odisha                | Eastern       | 14.95                                     |
| Khordha                     | Odisha                | Eastern       | 14.04                                     |
| Jagatsinghapur              | Odisha                | Eastern       | 10.44                                     |
| Cuttack                     | Odisha                | Eastern       | 20.41                                     |
| Kendrapara                  | Odisha                | Eastern       | 12.72                                     |
| Jajapur                     | Odisha                | Eastern       | 13.72                                     |
| Dhenkanal                   | Odisha                | Eastern       | 11.99                                     |
| Baleshwar                   | Odisha                | Eastern       | 12.94                                     |
| Tarn Taran                  | Punjab                | Northern      | 14.84                                     |
| Amritsar                    | Punjab                | Northern      | 10.24                                     |
| Hoshiarpur                  | Punjab                | Northern      | 16.37                                     |
| Kapurthala                  | Punjab                | Northern      | 14.25                                     |
| Udham Singh Nagar           | Uttarakhand           | Northern      | 16.40                                     |
| North                       | Delhi                 | Northern      | 14.47                                     |
| Kollam                      | Kerala                | Southern      | 13.25                                     |
| Alappuzha                   | Kerala                | Southern      | 16.36                                     |
| Pathanamthitta              | Kerala                | Southern      | 16.37                                     |
| Kottayam                    | Kerala                | Southern      | 21.81                                     |
| Idukki                      | Kerala                | Southern      | 13.95                                     |
| Ernakulam                   | Kerala                | Southern      | 15.67                                     |
| Malappuram                  | Kerala                | Southern      | 15.96                                     |
| Kozhikode                   | Kerala                | Southern      | 16.40                                     |
| Wayanad                     | Kerala                | Southern      | 18.33                                     |
| Tirunelveli                 | Tamil Nadu            | Southern      | 13.46                                     |
| Virudhunagar                | Tamil Nadu            | Southern      | 14.53                                     |
| Sivaganga                   | Tamil Nadu            | Southern      | 14.03                                     |
| Madurai                     | Tamil Nadu            | Southern      | 15.88                                     |
| Theni                       | Tamil Nadu            | Southern      | 13.93                                     |
| Thiruvavarur                | Tamil Nadu            | Southern      | 11.95                                     |
| Dindigul                    | Tamil Nadu            | Southern      | 12.90                                     |
| The Nilgiris                | Tamil Nadu            | Southern      | 12.17                                     |
| Tiruchirappalli             | Tamil Nadu            | Southern      | 14.84                                     |
| Ariyalur                    | Tamil Nadu            | Southern      | 12.39                                     |
| Viluppuram                  | Tamil Nadu            | Southern      | 10.15                                     |
| Krishnagiri                 | Tamil Nadu            | Southern      | 11.35                                     |
| Kancheepuram                | Tamil Nadu            | Southern      | 11.27                                     |
| Thiruvallur                 | Tamil Nadu            | Southern      | 12.09                                     |
| Mysore                      | Karnataka             | Southern      | 12.58                                     |
| Kodagu                      | Karnataka             | Southern      | 14.10                                     |
| Ramanagara                  | Karnataka             | Southern      | 11.18                                     |
| Bangalore Rural             | Karnataka             | Southern      | 13.40                                     |
| Chikkaballapura             | Karnataka             | Southern      | 11.38                                     |
| Tumkur                      | Karnataka             | Southern      | 12.23                                     |
| Chikmagalur                 | Karnataka             | Southern      | 12.61                                     |
| Chittoor                    | Andhra Pradesh        | Southern      | 13.84                                     |
| Sri Potti Sriramulu Nellore | Andhra Pradesh        | Southern      | 15.60                                     |
| Y.S.R.                      | Andhra Pradesh        | Southern      | 13.83                                     |
| Prakasam                    | Andhra Pradesh        | Southern      | 16.11                                     |
| Guntur                      | Andhra Pradesh        | Southern      | 16.73                                     |
| West Godavari               | Andhra Pradesh        | Southern      | 14.51                                     |
| East Godavari               | Andhra Pradesh        | Southern      | 13.36                                     |
| Lunglei                     | Mizoram               | North-eastern | 14.57                                     |
| Serchhip                    | Mizoram               | North-eastern | 17.85                                     |

|                            |               |               |       |
|----------------------------|---------------|---------------|-------|
| Champhai                   | Mizoram       | North-eastern | 12.45 |
| Mamit                      | Mizoram       | North-eastern | 11.93 |
| Wokha                      | Nagaland      | North-eastern | 17.75 |
| Mokokchung                 | Nagaland      | North-eastern | 19.01 |
| Zunheboto                  | Nagaland      | North-eastern | 16.19 |
| Tuensang                   | Nagaland      | North-eastern | 11.57 |
| Jorhat                     | Assam         | North-eastern | 10.48 |
| South Twenty Four Parganas | West Bengal   | Eastern       | 11.62 |
| Haora                      | West Bengal   | Eastern       | 10.67 |
| Gorakhpur                  | Uttar Pradesh | Central       | 14.89 |
| Sant Kabir Nagar           | Uttar Pradesh | Central       | 15.62 |
| Siddharthnagar             | Uttar Pradesh | Central       | 17.58 |
| Gonda                      | Uttar Pradesh | Central       | 15.00 |
| Balrampur                  | Uttar Pradesh | Central       | 16.82 |
| Shrawasti                  | Uttar Pradesh | Central       | 11.30 |
| Ghaziabad                  | Uttar Pradesh | Central       | 14.72 |
| Bijnor                     | Uttar Pradesh | Central       | 10.95 |

---
