# Supplementary material
Source: PubMed Central journal article supplement (PMC7270370)
Supplement: 40200_2020_545_MOESM2_ESM.pdf [file 40200_2020_545_MOESM2_ESM.pdf]

**Table B**  
List of coldspots for the prevalence of diabetes

| <b>Cold spot (District)</b> | <b>State/Union Territory</b> | <b>Region</b> | <b>Prevalence of Diabetes<br/>(per 100 women)</b> |
|-----------------------------|------------------------------|---------------|---------------------------------------------------|
| Leh(Ladakh)                 | Jammu & Kashmir              | Northern      | 4.55                                              |
| Jaipur                      | Rajasthan                    | Northern      | 5.33                                              |
| Khagaria                    | Bihar                        | Eastern       | 6.43                                              |
| Jaintia Hills               | Meghalaya                    | North-eastern | 9.76                                              |
| Doda                        | Jammu & Kashmir              | Northern      | 7.69                                              |
| Kishtwar                    | Jammu & Kashmir              | Northern      | 4.82                                              |
| Lahul & Spiti               | Himachal Pradesh             | Northern      | 3.74                                              |
| Mahendragarh                | Haryana                      | Northern      | 5.93                                              |
| Bhiwani                     | Haryana                      | Northern      | 7.14                                              |
| Rohtak                      | Haryana                      | Northern      | 7.96                                              |
| Barmer                      | Rajasthan                    | Northern      | 4.80                                              |
| Jaisalmer                   | Rajasthan                    | Northern      | 3.08                                              |
| Jodhpur                     | Rajasthan                    | Northern      | 5.86                                              |
| Jhunjhunun                  | Rajasthan                    | Northern      | 5.84                                              |
| Sikar                       | Rajasthan                    | Northern      | 7.51                                              |
| Churu                       | Rajasthan                    | Northern      | 4.39                                              |
| Bikaner                     | Rajasthan                    | Northern      | 7.76                                              |
| Udaipur                     | Rajasthan                    | Northern      | 4.99                                              |
| Sirohi                      | Rajasthan                    | Northern      | 7.11                                              |
| Jalor                       | Rajasthan                    | Northern      | 6.22                                              |
| Pali                        | Rajasthan                    | Northern      | 5.91                                              |
| Ajmer                       | Rajasthan                    | Northern      | 9.45                                              |
| Rajsamand                   | Rajasthan                    | Northern      | 7.57                                              |
| Baran                       | Rajasthan                    | Northern      | 6.51                                              |
| Bundi                       | Rajasthan                    | Northern      | 7.71                                              |
| Nagaur                      | Rajasthan                    | Northern      | 3.73                                              |
| Tonk                        | Rajasthan                    | Northern      | 5.32                                              |
| Sawai Madhopur              | Rajasthan                    | Northern      | 6.28                                              |
| Dausa                       | Rajasthan                    | Northern      | 3.08                                              |
| Karauli                     | Rajasthan                    | Northern      | 6.15                                              |
| Dhaulpur                    | Rajasthan                    | Northern      | 4.29                                              |
| Bharatpur                   | Rajasthan                    | Northern      | 6.03                                              |
| Alwar                       | Rajasthan                    | Northern      | 4.19                                              |
| Bid                         | Maharashtra                  | Western       | 10.02                                             |
| Parbhani                    | Maharashtra                  | Western       | 7.32                                              |
| Hingoli                     | Maharashtra                  | Western       | 7.97                                              |

|                  |                   |               |      |
|------------------|-------------------|---------------|------|
| Buldana          | Maharashtra       | Western       | 7.51 |
| West Garo Hills  | Meghalaya         | North-eastern | 7.71 |
| East Garo Hills  | Meghalaya         | North-eastern | 5.93 |
| West Khasi Hills | Meghalaya         | North-eastern | 6.70 |
| Upper Subansiri  | Arunachal Pradesh | North-eastern | 8.79 |
| Goalpara         | Assam             | North-eastern | 5.68 |
| Kamrup           | Assam             | North-eastern | 7.98 |
| Harda            | Madhya Pradesh    | Central       | 8.11 |
| Rajgarh          | Madhya Pradesh    | Central       | 3.56 |
| Sehore           | Madhya Pradesh    | Central       | 4.69 |
| Morena           | Madhya Pradesh    | Central       | 5.06 |
| Bhind            | Madhya Pradesh    | Central       | 4.58 |
| Gwalior          | Madhya Pradesh    | Central       | 6.65 |
| Datia            | Madhya Pradesh    | Central       | 5.83 |
| Sheopur          | Madhya Pradesh    | Central       | 7.48 |
| Shivpuri         | Madhya Pradesh    | Central       | 7.26 |
| Guna             | Madhya Pradesh    | Central       | 5.17 |
| Bhopal           | Madhya Pradesh    | Central       | 8.50 |
| Rewa             | Madhya Pradesh    | Central       | 7.42 |
| Singrauli        | Madhya Pradesh    | Central       | 9.22 |
| Gumla            | Jharkhand         | Eastern       | 6.59 |
| Garhwa           | Jharkhand         | Eastern       | 5.69 |
| Palamu           | Jharkhand         | Eastern       | 7.19 |
| Latehar          | Jharkhand         | Eastern       | 3.20 |
| Godda            | Jharkhand         | Eastern       | 7.87 |
| Gaya             | Bihar             | Eastern       | 8.78 |
| Sheikhpura       | Bihar             | Eastern       | 5.02 |
| Nalanda          | Bihar             | Eastern       | 6.20 |
| Jamui            | Bihar             | Eastern       | 4.71 |
| Banka            | Bihar             | Eastern       | 5.51 |
| Lakhisarai       | Bihar             | Eastern       | 5.19 |
| Munger           | Bihar             | Eastern       | 5.33 |
| Patna            | Bihar             | Eastern       | 8.67 |
| Vaishali         | Bihar             | Eastern       | 8.92 |
| Samastipur       | Bihar             | Eastern       | 2.22 |
| Begusarai        | Bihar             | Eastern       | 5.11 |
| Darbhanga        | Bihar             | Eastern       | 7.25 |
| Bhagalpur        | Bihar             | Eastern       | 7.14 |

|                              |               |         |      |
|------------------------------|---------------|---------|------|
| Madhepura                    | Bihar         | Eastern | 6.66 |
| Supaul                       | Bihar         | Eastern | 7.88 |
| Saharsa                      | Bihar         | Eastern | 6.67 |
| Sonbhadra                    | Uttar Pradesh | Central | 6.38 |
| Mirzapur                     | Uttar Pradesh | Central | 4.95 |
| Sant Ravidas Nagar (Bhadohi) | Uttar Pradesh | Central | 6.10 |
| Varanasi                     | Uttar Pradesh | Central | 8.80 |
| Allahabad                    | Uttar Pradesh | Central | 6.57 |
| Chitrakoot                   | Uttar Pradesh | Central | 5.37 |
| Kaushambi                    | Uttar Pradesh | Central | 4.03 |
| Pratapgarh                   | Uttar Pradesh | Central | 4.74 |
| Banda                        | Uttar Pradesh | Central | 1.96 |
| Mahoba                       | Uttar Pradesh | Central | 4.81 |
| Jhansi                       | Uttar Pradesh | Central | 7.96 |
| Hamirpur                     | Uttar Pradesh | Central | 4.46 |
| Jalaun                       | Uttar Pradesh | Central | 5.56 |
| Fatehpur                     | Uttar Pradesh | Central | 3.80 |
| Rae Bareli                   | Uttar Pradesh | Central | 6.39 |
| Jaunpur                      | Uttar Pradesh | Central | 7.22 |
| Sultanpur                    | Uttar Pradesh | Central | 6.43 |
| Unnao                        | Uttar Pradesh | Central | 6.68 |
| Kanpur Nagar                 | Uttar Pradesh | Central | 5.04 |
| Auraiya                      | Uttar Pradesh | Central | 3.71 |
| Kanpur Dehat                 | Uttar Pradesh | Central | 4.67 |
| Agra                         | Uttar Pradesh | Central | 8.29 |
| Etawah                       | Uttar Pradesh | Central | 7.75 |
| Kannauj                      | Uttar Pradesh | Central | 6.95 |
| Hardoi                       | Uttar Pradesh | Central | 7.66 |
| Firozabad                    | Uttar Pradesh | Central | 6.75 |
| Mainpuri                     | Uttar Pradesh | Central | 4.51 |
| Farrukhabad                  | Uttar Pradesh | Central | 8.75 |
| Mahamaya Nagar               | Uttar Pradesh | Central | 9.11 |
| Etah                         | Uttar Pradesh | Central | 4.55 |

---
